# Supplementary material for: Mitochondrial electron transport chain, ceramide, and coenzyme Q are linked in a pathway that drives insulin resistance in skeletal muscle
Source: eLife journal article supplement (doi:10.7554/elife.87340), 2023-05-04
Supplement: figures [file elife-87340-figures-v1.pdf]

---

## Figures and figure supplements

Mitochondrial electron transport chain, ceramide, and coenzyme Q are linked in a pathway that drives insulin resistance in skeletal muscle

**Alexis Diaz-Vegas et al.**

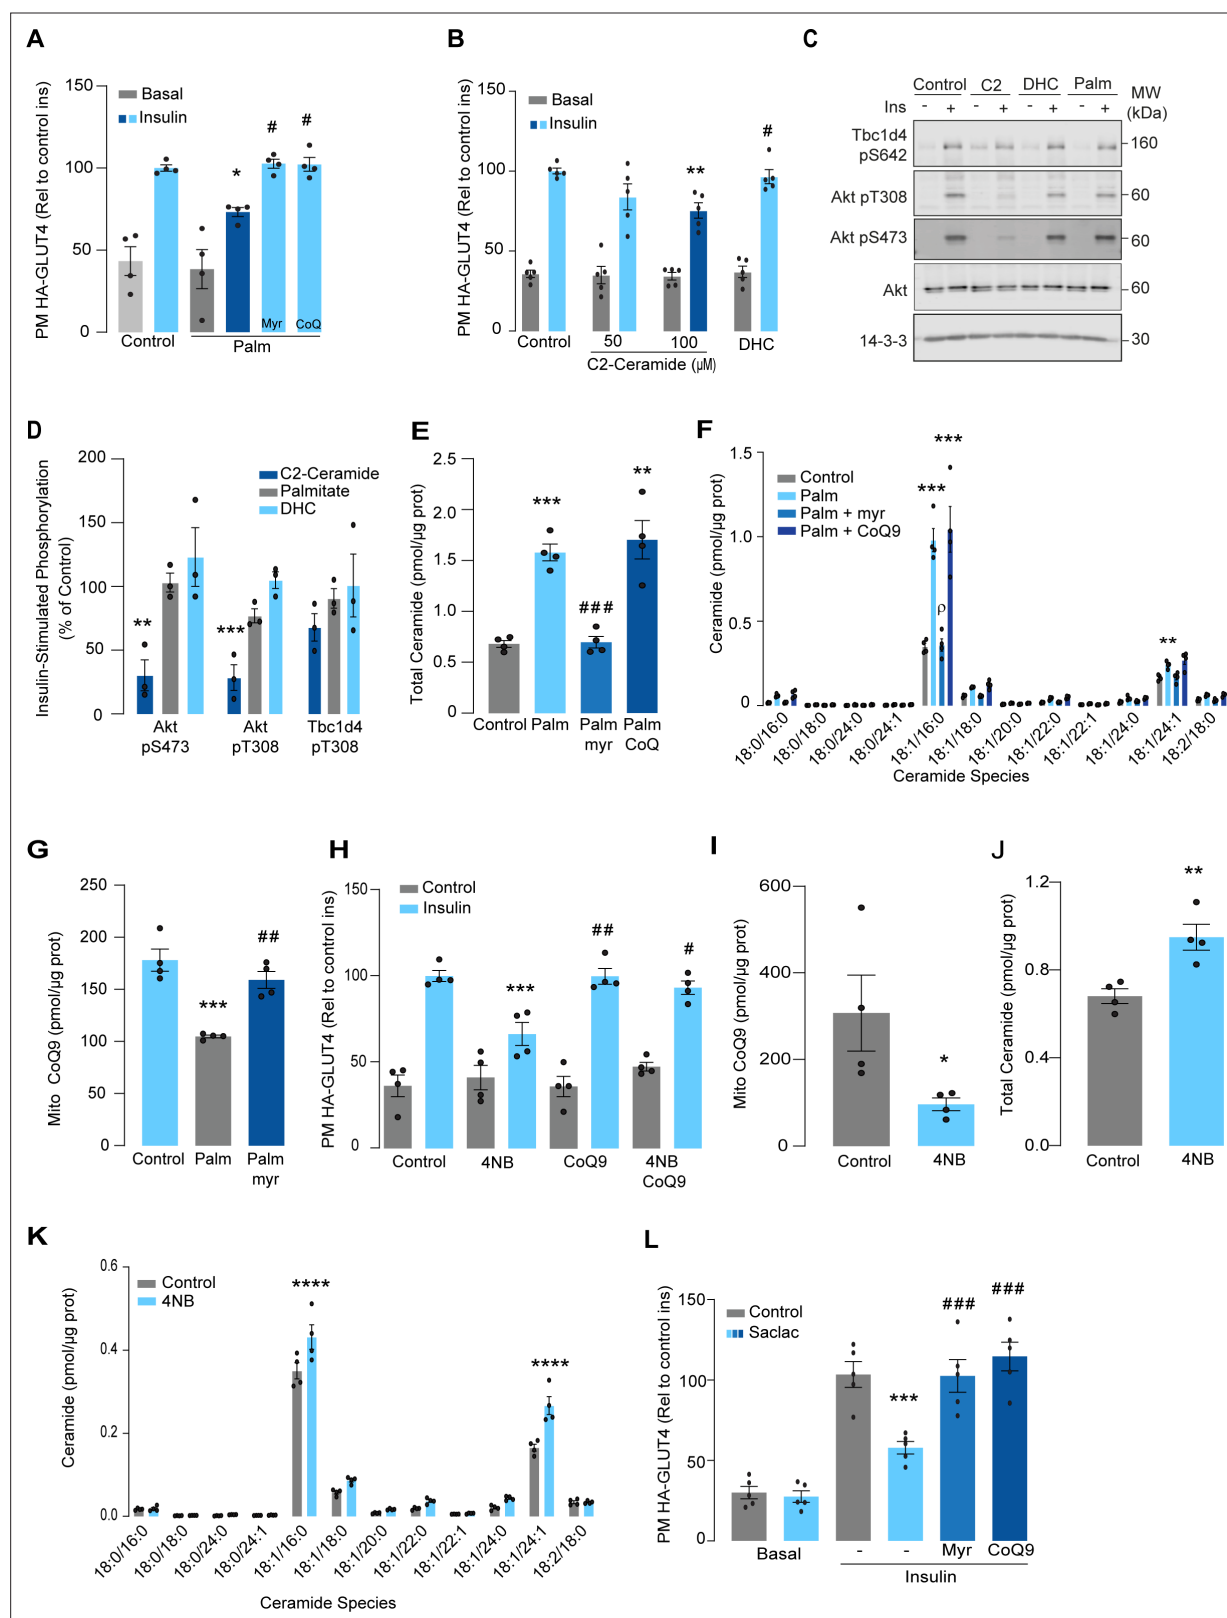

**Figure 1.** Palmitate increases ceramides, decreases coenzyme Q (CoQ), and induces insulin resistance in L6 myotubes. **(A)** Insulin-induced GLUT4 translocation in L6-HA-GLUT4 myotubes exposed to palmitate (150  $\mu$ M for 16 hr, Palm) or BSA (Control) in the presence of DMSO (Control), myriocin (10  $\mu$ M for 16 hr), or CoQ9 (10  $\mu$ M for 16 hr). Plasma membrane GLUT4 (PM-GLUT4) abundance was normalized to insulin-treated control cells. N = 4 biological replicates, mean  $\pm$  SEM. \* $p$ <0.05 vs Control ins, #  $p$ <0.5 vs Palm ins. **(B)** Insulin-induced GLUT4 translocation in L6-HA-GLUT4 myotubes

Figure 1 continued on next page

## Figure 1 continued

exposed to C2-ceramide, dihydroceramide (100  $\mu$ M, DHC) or DMSO (Control) for 2 hr. Plasma membrane GLUT4 (PM-GLUT4) abundance was normalized to insulin-treated control cells. N = 5 biological replicates, mean  $\pm$  SEM. \*\* $p$ <0.01 vs Control ins, #  $p$ <0.05 vs 100  $\mu$ M C2-ceramide ins. **(C, D)** L6-HA-GLUT4 myotubes were serum-starved after BSA (Control for 16 hr), palmitate (Palm for 16 hr), C2-ceramide (100  $\mu$ M for 2 hr, C2), or DHC (100  $\mu$ M for 2 hr) treatment and acute insulin (Ins) was added where indicated. Phosphorylation status of indicated sites was assessed by immunoblot **(C)**. Immunoblots were quantified by densitometry and normalized to insulin-treated control cells (indicated by dotted line). N = 3 biological replicates, mean  $\pm$  SEM. \*\* $p$ <0.01, \*\*\* $p$ <0.001. **(E, F)** Endogenous ceramides levels in L6-HA-GLUT4 myotubes treated for 16 hr with BSA (control), palmitate (150  $\mu$ M, Palm), myriocin (10  $\mu$ M for 16 hr), or CoQ (10  $\mu$ M for 16 hr) as indicated in the graph. Total **(E)** and specific **(F)** ceramide species were quantified. N = 4 biological replicates, mean  $\pm$  SEM. \*\* $p$ <0.01, \*\*\*\* $p$ <0.001 vs Control, ### $p$ <0.001 vs Palm,  $\rho$   $p$ <0.01 vs Palm. **(G)** CoQ9 level in mitochondrial fraction obtained from L6-HA-GLUT4 myotubes. N = 4 biological replicates, mean  $\pm$  SEM. \*\*\* $p$ <0.001 vs Control, ## $p$ <0.01 vs Palm. **(H)** Insulin-induced GLUT4 translocation in L6-HA-GLUT4 myotubes exposed to 4-NB (2.5 mM for 16 hr) or DMSO (Control) in the presence of CoQ9 (10  $\mu$ M for 16 hr). Plasma membrane GLUT4 (PM-GLUT4) abundance was normalized to insulin-treated control cells. N = 4 biological replicates, mean  $\pm$  SEM. \*\*\* $p$ <0.001 vs Control ins, ## $p$ <0.01, ### $p$ <0.001 vs 4NB. **(I)** CoQ9 level in mitochondrial fraction obtained from L6-HA-GLUT4 myotubes exposed to DMSO (Control) or 4NB for 16 hr. N = 4 biological replicates, mean  $\pm$  SEM. \* $p$ <0.05 **(J, K)** Total **(J)** and specific **(K)** ceramide species quantified in L6-HA-GLUT4 myotubes treated for 16 hr with DMSO (control) or 4NB (2.5 mM for 16 hr). N = 4 biological replicates, mean  $\pm$  SEM. \*\* $p$ <0.01, \*\*\*\* $p$ <0.0001. **(L)** Insulin-induced GLUT4 translocation in L6-HA-GLUT4 myotubes exposed to SacIac (10  $\mu$ M for 24 hr) or EtOH (Control) in the presence of DMSO (control), myriocin (10  $\mu$ M for 16 hr), or CoQ9 (10  $\mu$ M for 16 hr). Plasma membrane GLUT4 (PM-GLUT4) abundance was normalized to insulin-treated control cells. N = 5 biological replicates, mean  $\pm$  SEM. \*\*\* $p$ <0.001 vs Control Ins, ### $p$ <0.001 vs SacIac Ins.

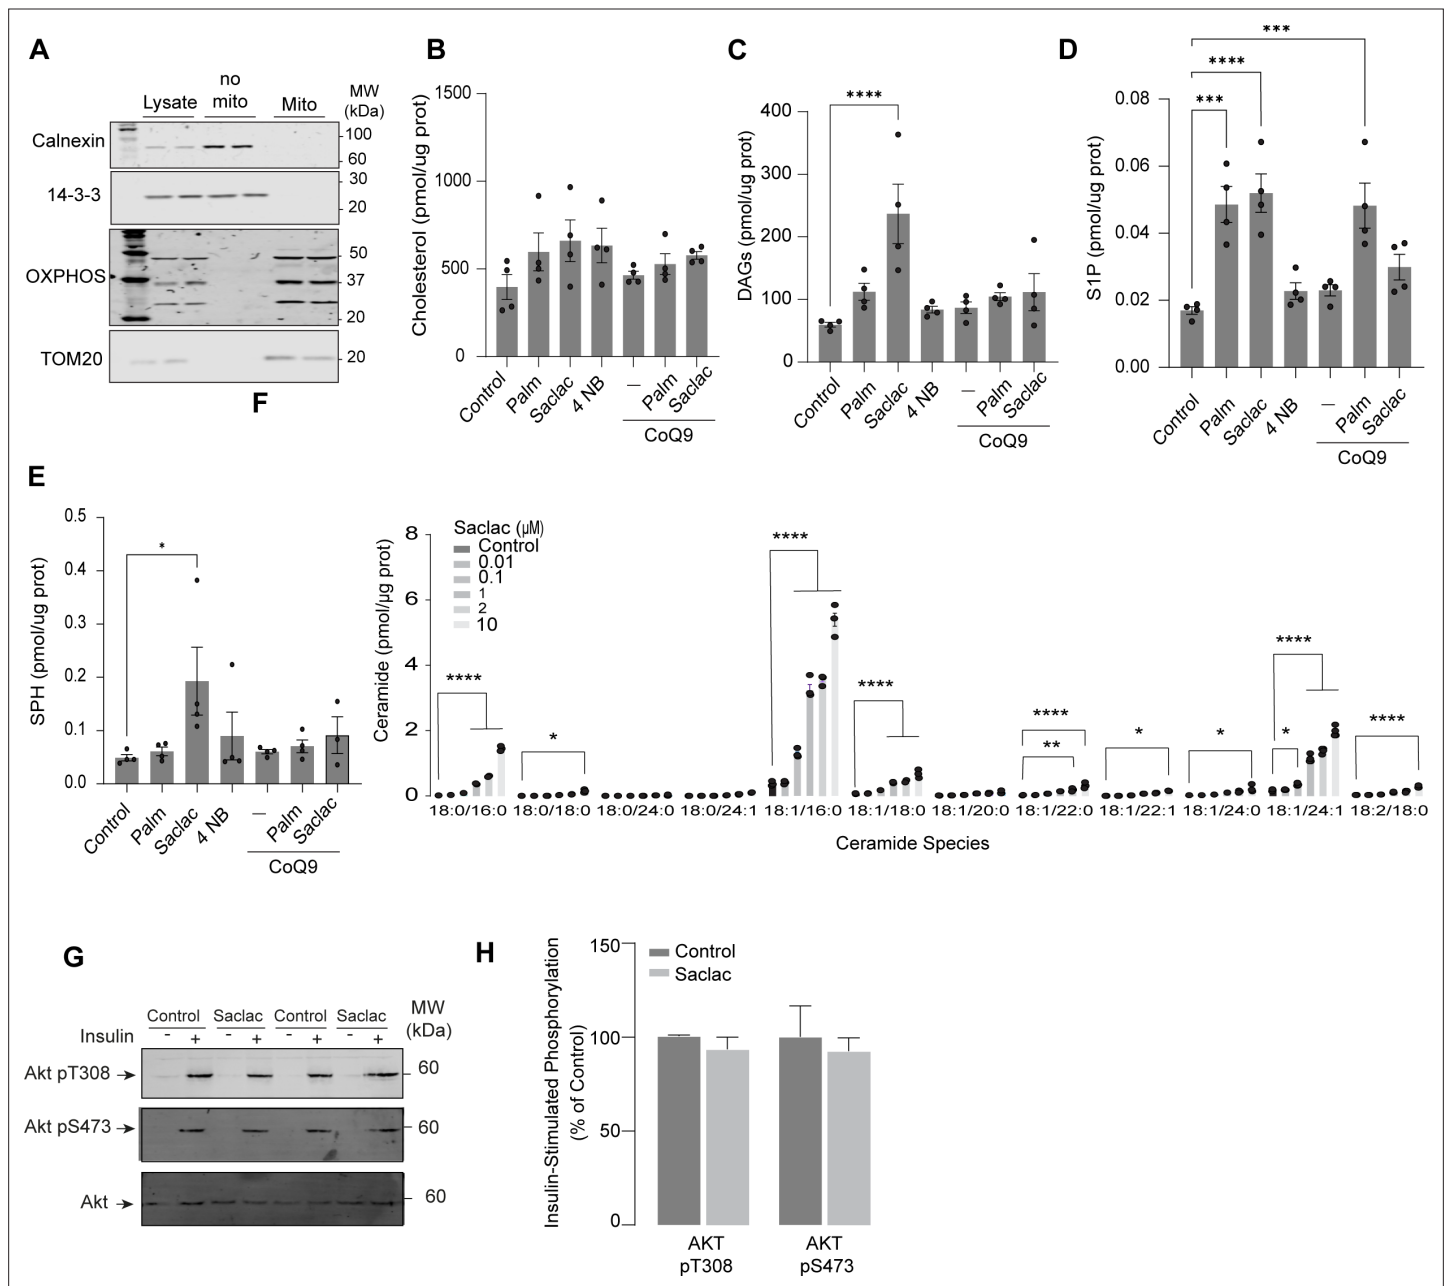

**Figure 1—figure supplement 1.** Inhibiting ceramidases is sufficient to decrease CoQ levels, leading to insulin resistance. **(A)** Mitochondrial-enriched fraction from L6 myotubes. Calnexin was used as a marker of endoplasmic reticulum. OXPHOS: oxidative phosphorylation system. Cholesterol **(B)**, diacylglycerol (DAGs) **(C)**, sphingosine-1 phosphate (S1P) **(D)**, and sphingosine (SPH) **(E)** abundance in L6 myotubes exposed to different compounds (as indicated). Lipid abundance was determined by lipidomics and normalized against protein concentration. N = 4, mean  $\pm$  SEM. \*\*\* $p$ <0.001, \*\*\*\* $p$ <0.0001. **(F)** Concentration of endogenous ceramide in L6-HA-GLUT4 myotubes treated for 24 hr with EtOH (Control) or different concentrations of Saclac. N = 3, mean  $\pm$  SEM. \* $p$ <0.05, \*\* $p$ <0.01, \*\*\*\* $p$ <0.0001. **(G, H)** L6-HA-GLUT4 myotubes were serum-starved after EtOH (Control) or Saclac (10  $\mu$ M) treatment (for 24 hr) and acute insulin (Ins) was added where indicated. Phosphorylation status of indicated sites was assessed by immunoblot. Immunoblots were quantified by densitometry and normalized to insulin-treated control cells. N = 2, mean  $\pm$  SEM.



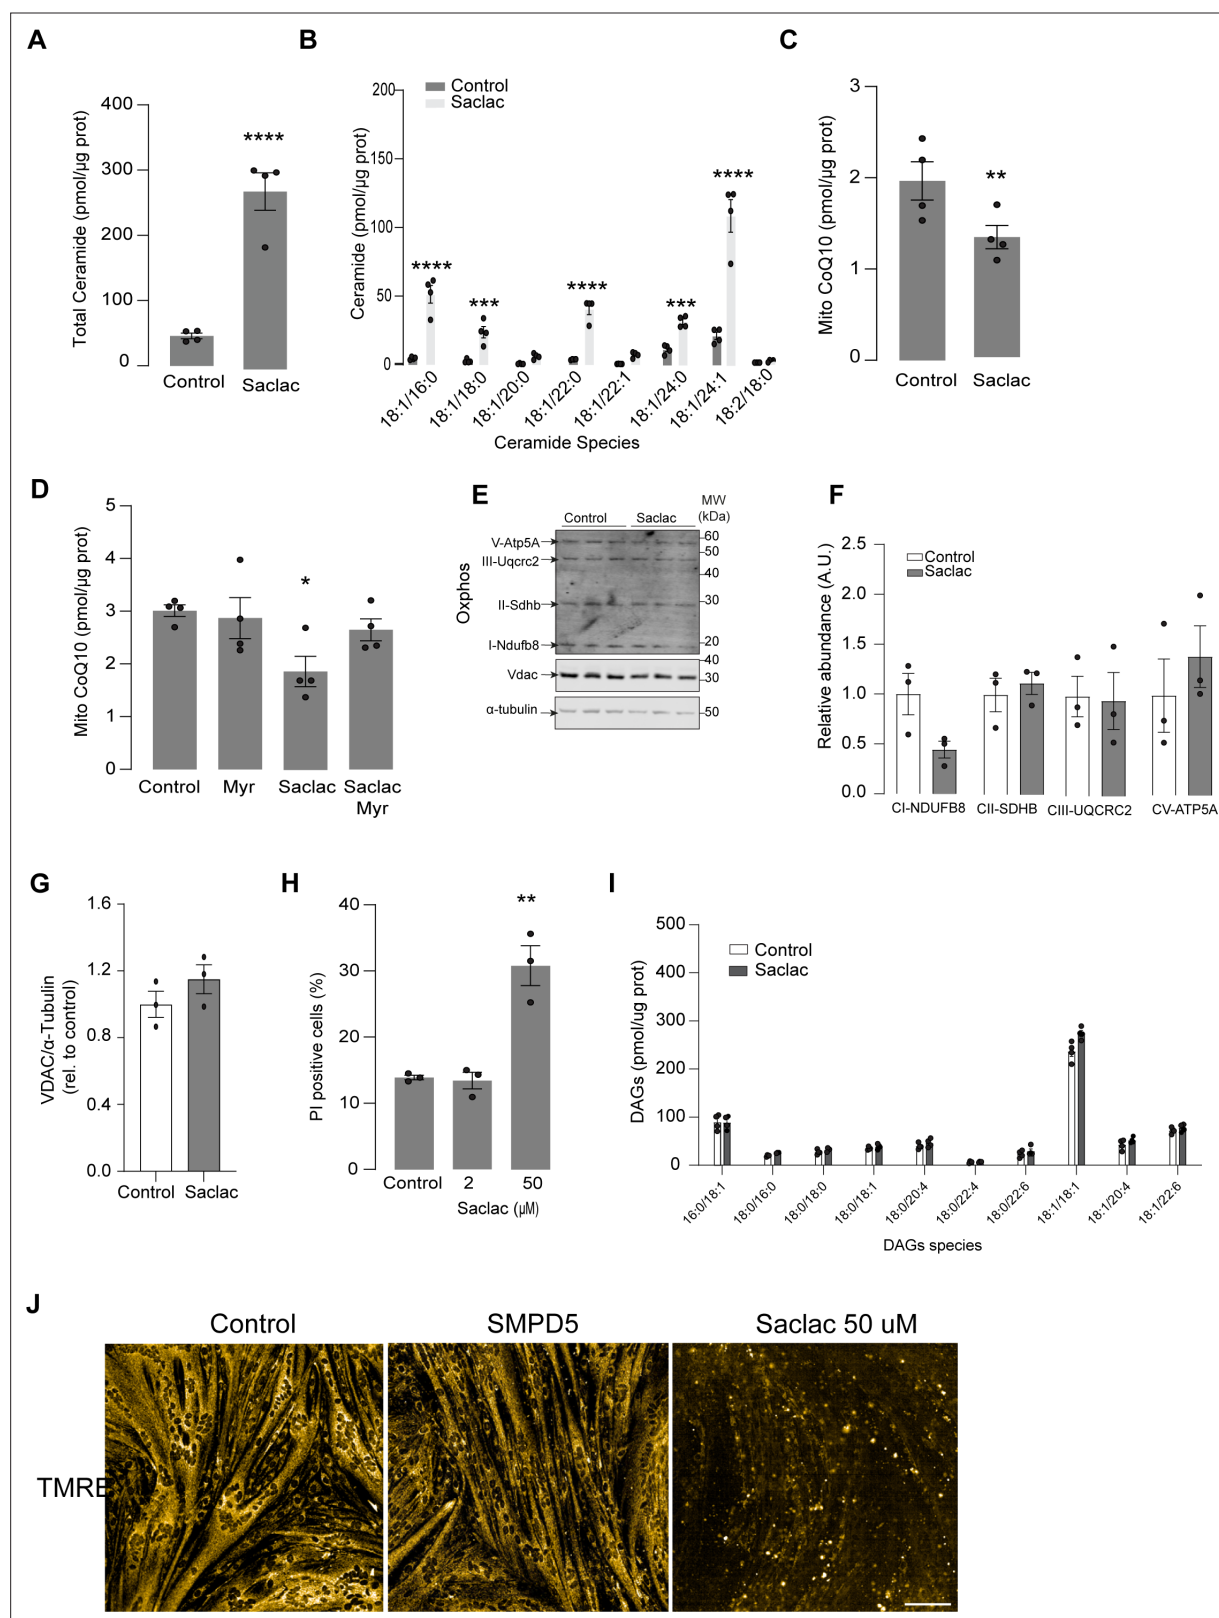

**Figure 1—figure supplement 2.** Inhibition of ceramidases induces CoQ depletion in human cell line. (A, B) Total (A) and specific (B) ceramide species quantified in HeLa cells treated for 24 hr with Saclac (2  $\mu$ M for 24 hr) or vehicle control (EtOH, Control) as indicated. N = 4, mean  $\pm$  SEM. \*\* $p$ <0.01, \*\*\*\* $p$ <0.0001 vs Control. (C) CoQ10 levels in the mitochondrial fraction obtained from HeLa cells exposed to different concentrations of Saclac or vehicle control. N = 4, mean  $\pm$  SEM. \* $p$ <0.05. (D) CoQ10 levels in the mitochondrial fraction obtained from HeLa cells exposed to different concentrations of Saclac or vehicle control. N = 4, mean  $\pm$  SEM. \* $p$ <0.05. (E) Western blot of Oxphos proteins in Control and Saclac groups. (F) Relative abundance (A.U.) of Oxphos proteins in Control and Saclac groups. (G) VDAC/ $\alpha$ -Tubulin (rel. to control) in Control and Saclac groups. (H) PI positive cells (%) in Control, 2  $\mu$ M Saclac, and 50  $\mu$ M Saclac groups. (I) DAGs (pmol/ $\mu$ g prot) in Control and Saclac groups. (J) TMRE staining images for Control, SMPD5, and Saclac 50  $\mu$ M groups.

Figure 1—figure supplement 2 continued on next page

*Figure 1—figure supplement 2 continued*

concentrations of Saclac (2  $\mu$ M for 24 hr) or control in the presence or absence of myriocin (10  $\mu$ M for 16 hr). N = 4, mean  $\pm$  SEM. \* $p$ <0.05. **(E–G)** Mitochondrial abundance markers determined by western blot in HeLa cells exposed to 2  $\mu$ M of Saclac for 24 hr. **(F, G)** Immunoblots were quantified by densitometry and normalized to control cells. N = 3, mean  $\pm$  SEM. **(H)** Percentage of nonviable HeLa cells determined by propidium iodide (PI) staining and microscopy, following a 24 hr treatment with Saclac. N = 3, mean  $\pm$  SEM. \*\* $p$ <0.01. **(I)** Specific diacylglycerol species were quantified in HeLa cells exposed to Saclac vs Control. Lipid abundance was determined by lipidomics and normalized against protein concentration. N = 4, mean  $\pm$  SEM. \* $p$ <0.001, \*\*\*\* $p$ <0.0001. **(J)** L6 myotubes were loaded with TMRE (20 nM) for 20 min in control cells, SMPD5-overexpressing cells, and cells treated with Saclac (50  $\mu$ M) for 24 hr.

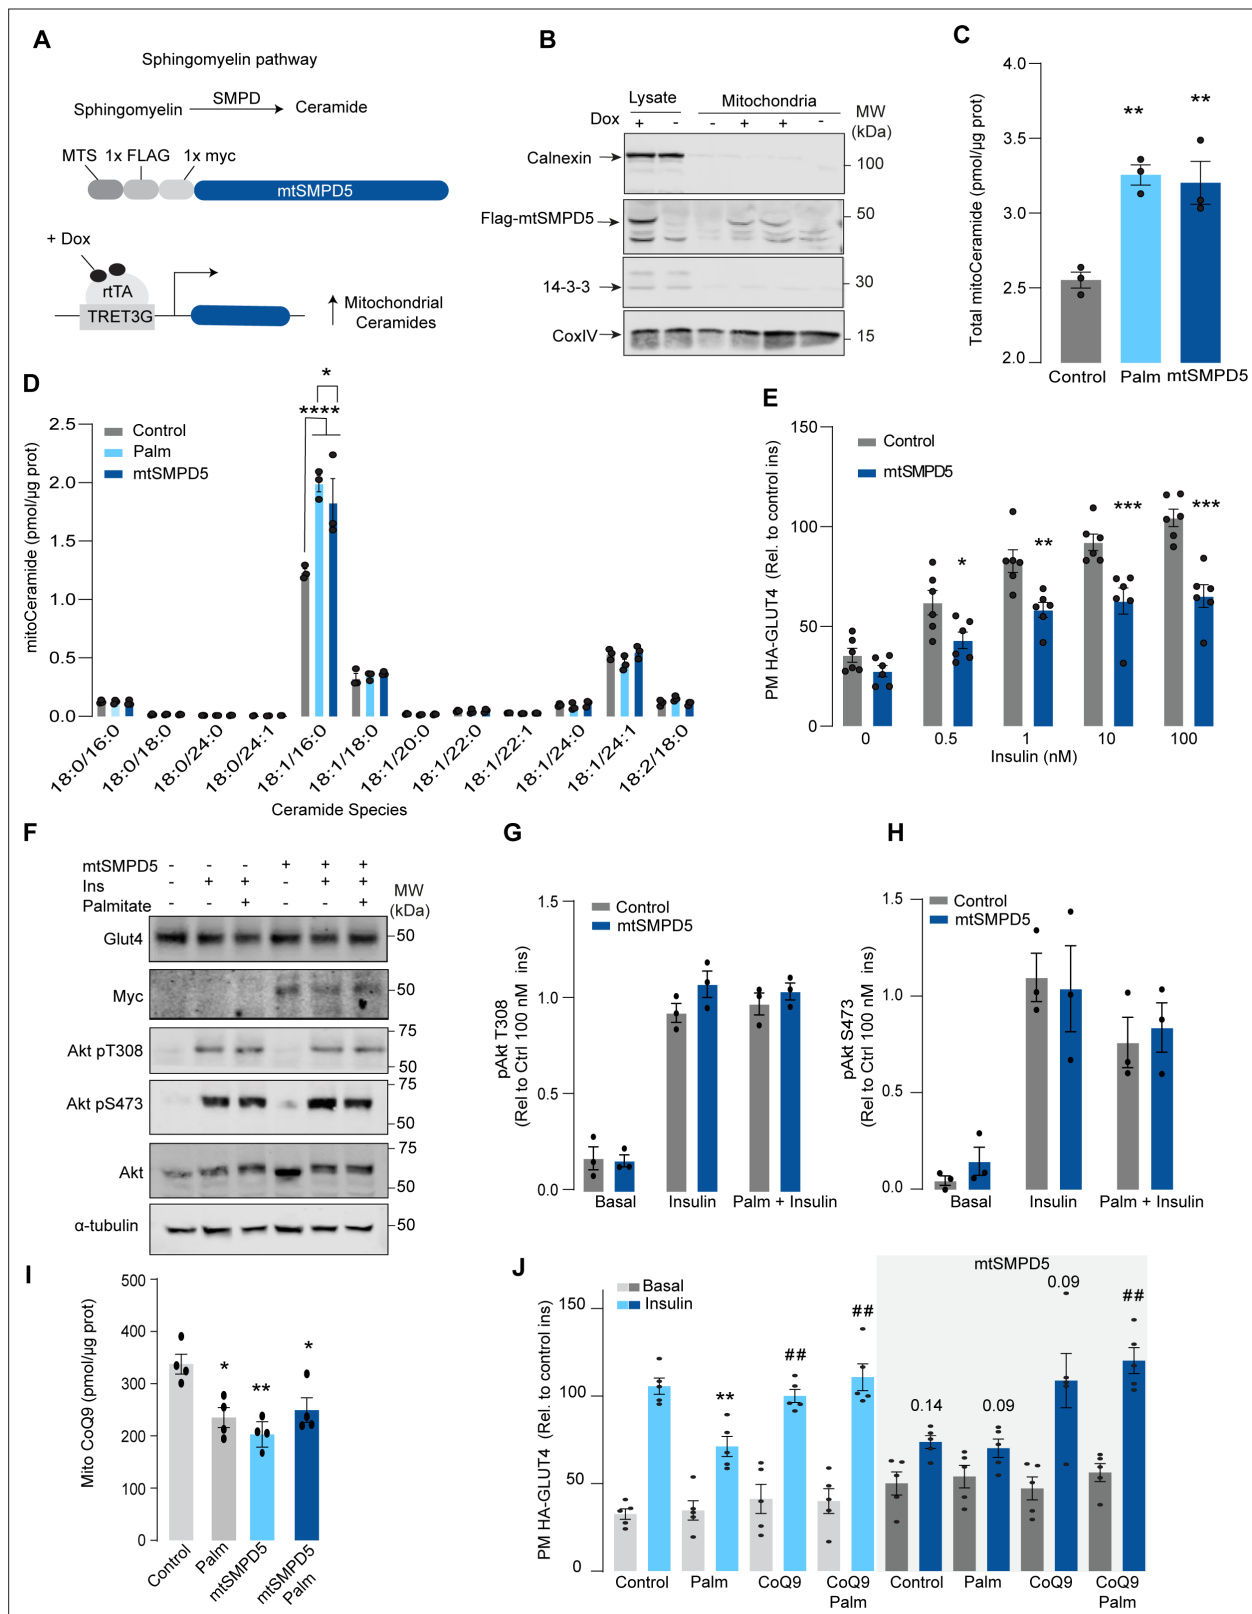

**Figure 2.** Mitochondrial overexpression of SMPD5 induces insulin resistance by lowering CoQ9 in L6 myotubes. **(A)** Schematic representation of doxycycline-inducible overexpression of mitochondrial-targeted sphingomyelinase 5 (SMPD5). L6-HA-GLUT4 myotubes were exposed to 1  $\mu$ M of doxycycline from day 3 to day 6 of differentiation. Experiments were performed on day 7 of differentiation. **(B)** Determination of SMPD5 expression in mitochondrial fraction obtained from L6-HA-GLUT4. Doxycycline was added where indicated. **(C, D)** Levels of endogenous ceramides in mitochondrial

Figure 2 continued on next page

## Figure 2 continued

fraction from L6-HA-GLUT4 myotubes treated with BSA (Control), palmitate (150  $\mu$ M for 16 hr, Palm), or doxycycline. Total (C) and specific (D) ceramide species were quantified. N = 3 biological replicates, mean  $\pm$  SEM. \* $p < 0.05$ , \*\* $p < 0.01$ , \*\*\*\* $p < 0.0001$  vs Control. (E) Insulin-induced GLUT4 translocation in L6-HA-GLUT4 myotubes exposed to doxycycline (1  $\mu$ g/mL for 3 d). Plasma membrane GLUT4 (PM-GLUT4) abundance was normalized to 100 nM insulin-treated control cells. N = 6 biological replicates, mean  $\pm$  SEM. \* $p < 0.05$ , \*\* $p < 0.01$ , \*\*\* $p < 0.001$  vs Control ins. (F–H) L6-HA-GLUT4 myotubes were serum-starved after BSA (Control), palmitate (150  $\mu$ M for 16 hr, Palm), or doxycycline (1  $\mu$ g/mL for 3 d) treatment and acute insulin (Ins) was added where indicated. Phosphorylation status of indicated sites was assessed by immunoblot. Immunoblots were quantified by densitometry and normalized to insulin-treated control cells (indicated by dotted line). N = 3 biological replicates, mean  $\pm$  SEM. \*  $p < 0.05$ , \*\*\*  $p < 0.001$  vs Basal. (I) CoQ9 level in mitochondrial fraction obtained from L6-HA-GLUT4 myotubes exposed to doxycycline (1  $\mu$ g/mL for 3 d). N = 4 biological replicates, mean  $\pm$  SEM. \*\* $p < 0.001$ . (J) Insulin-induced GLUT4 translocation in L6-HA-GLUT4 myotubes exposed to doxycycline (1  $\mu$ g/mL for 3 d). Control or doxycycline-treated cells were exposed to BSA (Control), palmitate (150  $\mu$ M for 16 hr, Palm), or CoQ9 (10  $\mu$ M for 16 hr). Plasma membrane GLUT4 (PM-GLUT4) abundance was normalized to insulin-treated control cells. N = 5 biological replicates, mean  $\pm$  SEM. \*\* $p < 0.01$  vs Control ins, ##  $p < 0.01$  vs Palm ins.

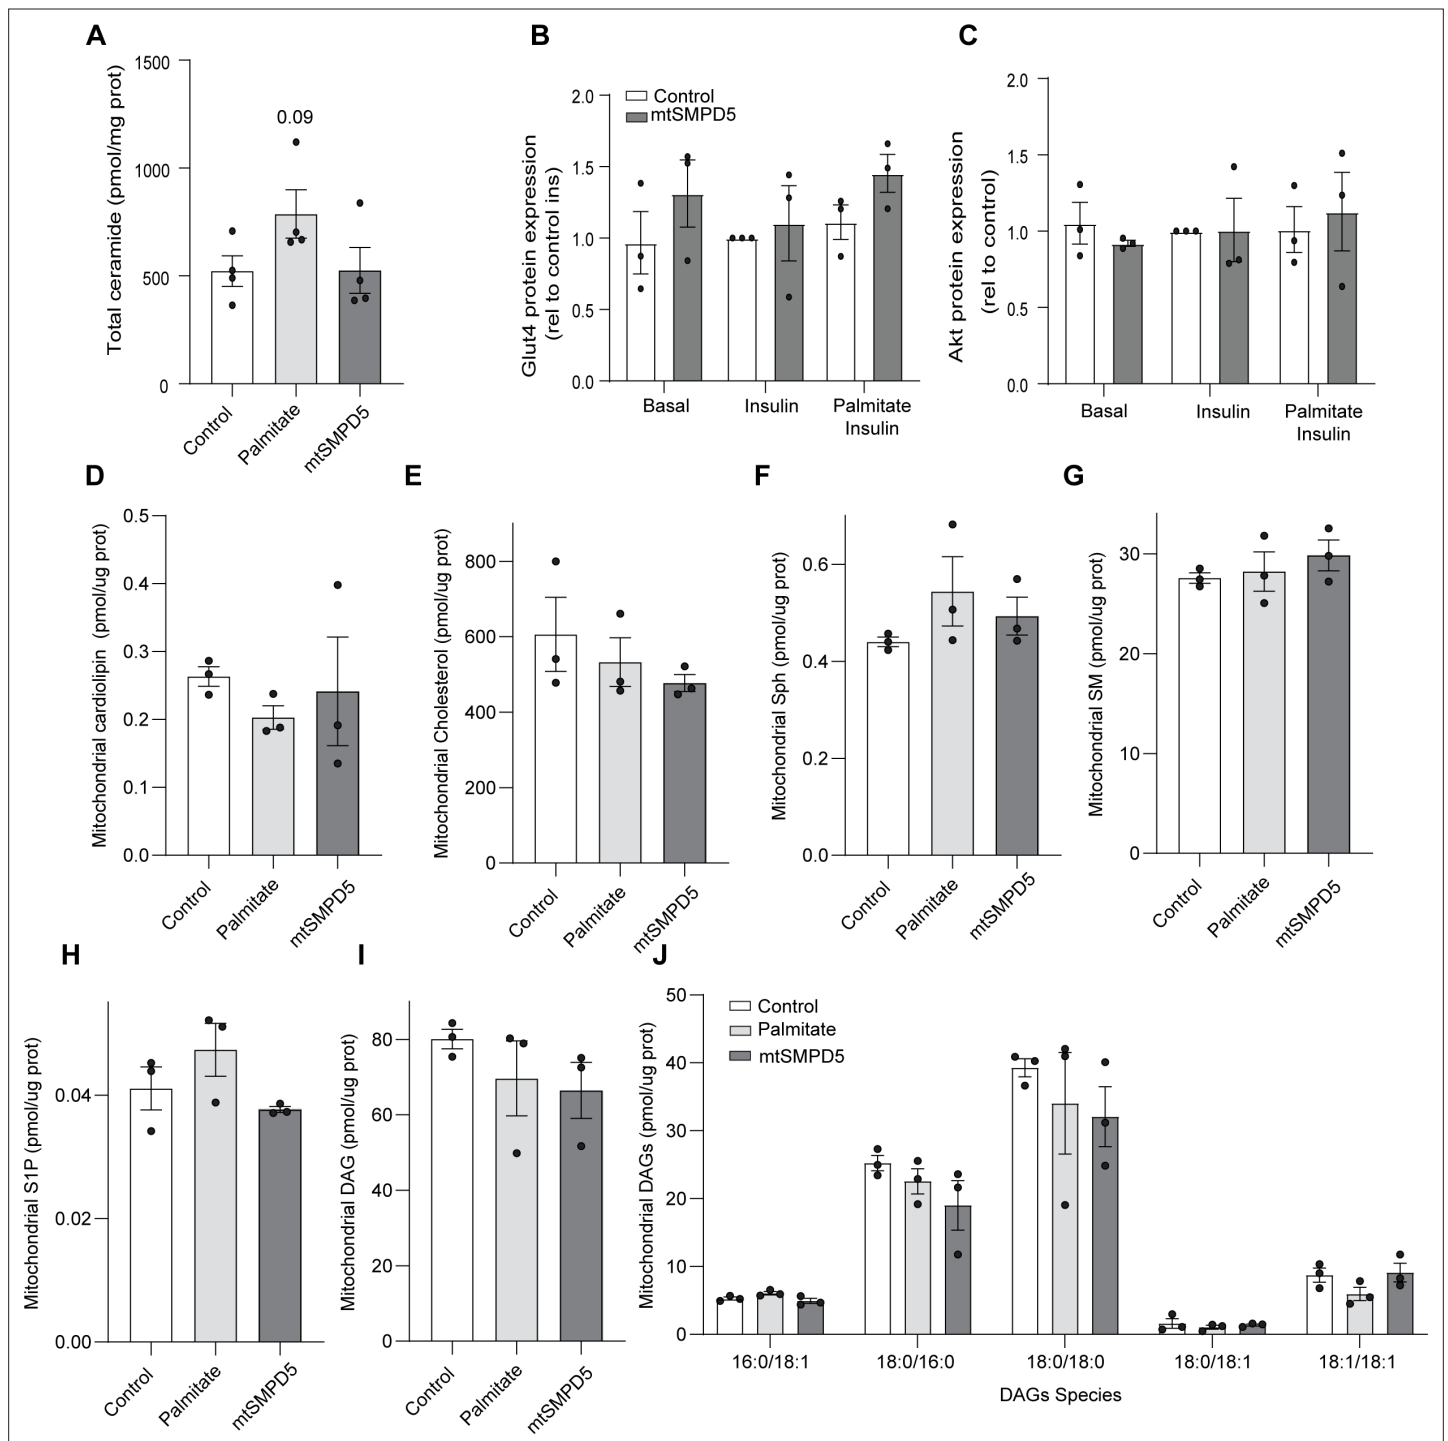

**Figure 2—figure supplement 1.** The overexpression of mtSMPD5 selectively increases mitochondrial ceramides. (A) Total ceramide levels extracted from whole lysate of L6 myotubes exposed to different treatments (as indicated). (B, C) Densitometric analysis of **Figure 3F** of selected proteins (as indicated). Mitochondrial levels of cardiolipin (D), cholesterol (E), sphingosine (F), sphingomyelin (G), sphingosine-1 phosphate (H), and diacylglycerol (I, J) (as indicated) were determined by lipidomics and normalized against mitochondrial protein concentration. Cells were exposed to doxycycline for 3 d for SMPD5 induction. N = 3, mean  $\pm$  SEM. \*\*\*\*p<0.0001.

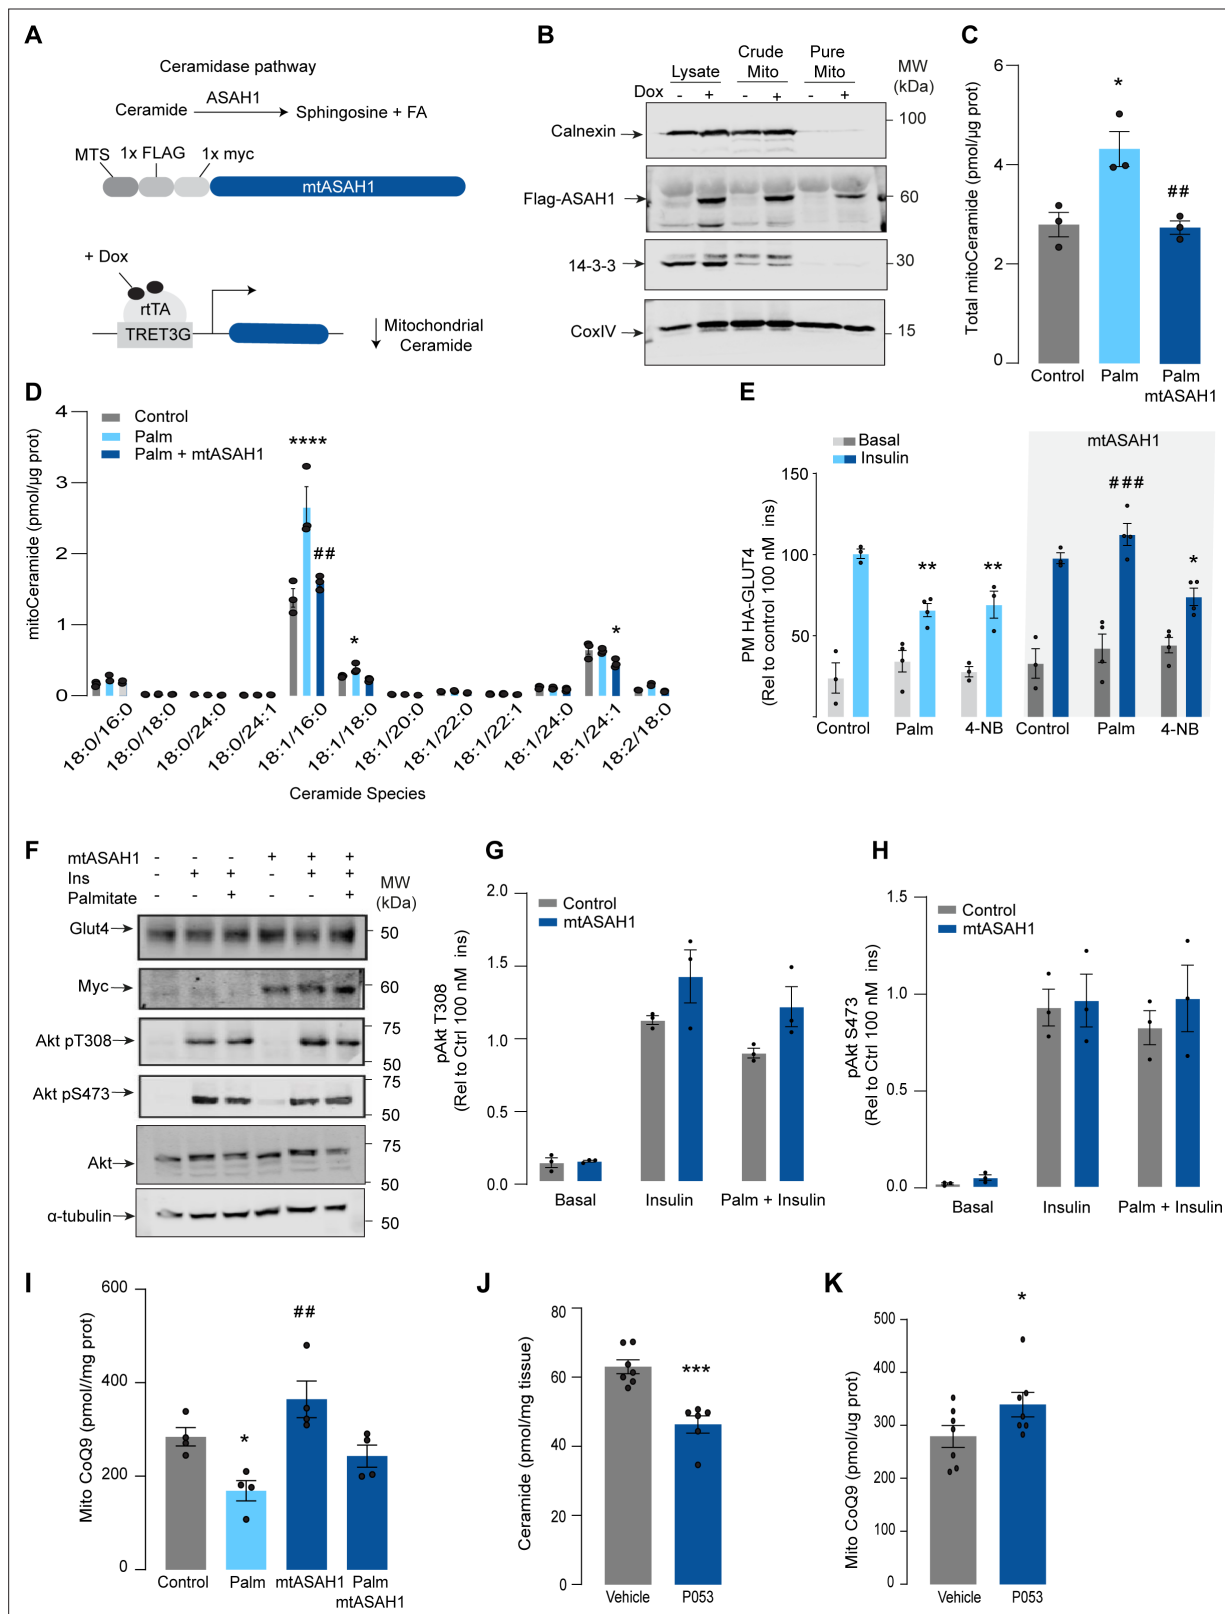

**Figure 3.** Mitochondrial overexpression of ASA1 protects against insulin resistance and increases coenzyme Q (CoQ) levels in L6 myotubes. (A) Schematic representation of doxycycline-inducible overexpression of mitochondrial-targeted acid ceramidase 1 (ASA1). L6-HA-GLUT4 myotubes were exposed to 1  $\mu\text{g}/\text{mL}$  of doxycycline from day 3 to day 6 of differentiation. Experiments were performed on day 7 of differentiation. (B) Determination of ASA1 expression in mitochondrial fraction obtained from L6-HA-GLUT4. Doxycycline was added where indicated. (C, D) Endogenous ceramides

Figure 3 continued on next page

## Figure 3 continued

levels in mitochondrial fraction from L6-HA-GLUT4 myotubes treated with BSA (Control), palmitate (150  $\mu$ M for 16 hr, Palm), or doxycycline. Total (C) and specific (D) ceramide species were quantified. N = 3 biological replicates, mean  $\pm$  SEM. \* $p$ <0.05 vs Control, ## $p$ <0.01 vs Palm. (E) Insulin-induced GLUT4 translocation in L6-HA-GLUT4 myotubes exposed to doxycycline (1  $\mu$ g/mL for 3 d). Control or doxycycline-treated cells were exposed to BSA (control), palmitate (150  $\mu$ M for 16 hr, Palm), or 4NB (2.5 mM for 16 hr). Plasma membrane GLUT4 (PM-GLUT4) abundance was normalized to insulin-treated control cells. N = 6 biological replicates, mean  $\pm$  SEM. \*\* $p$ <0.01 vs Control ins, ###  $p$ <0.001 vs Palm ins. (F–H) L6-HA-GLUT4 myotubes were serum-starved after BSA (Control), palmitate (150  $\mu$ M for 16 hr, Ppalm), or doxycycline (1  $\mu$ g/mL for 3 d) treatment and acute insulin (Ins) was added where indicated. Phosphorylation status of indicated sites was assessed by immunoblot. Immunoblots were quantified by densitometry and normalized to insulin-treated control cells (indicated by dotted line). N = 3 biological replicates, mean  $\pm$  SEM. \*\*\* $p$ <0.001 vs Basal, #  $p$ <0.05 vs Control ins. (I) CoQ9 level in mitochondrial fraction obtained from L6-HA-GLUT4 myotubes exposed to doxycycline (1  $\mu$ g/mL for 3 d). Control or doxycycline treated cells were exposed to BSA (Control) or palmitate (150  $\mu$ M for 16 hr, Palm) N = 4 biological replicates, mean  $\pm$  SEM. \* $p$ <0.05 vs Control, ##  $p$ <0.01 vs Palm. (J) Levels of total ceramides in skeletal muscle of mice fed chow with vehicle or 5 mg/kg P053 for 6 wk. N = 7 mice per group, mean  $\pm$  SEM. \*\*\* $p$ <0.001. (K) Levels of CoQ in mitochondrial fraction isolated from skeletal muscle of mice fed chow with vehicle or 5 mg/kg P053 for 6 wk. N = 7 mice per group, mean  $\pm$  SEM. \* $p$ <0.05.

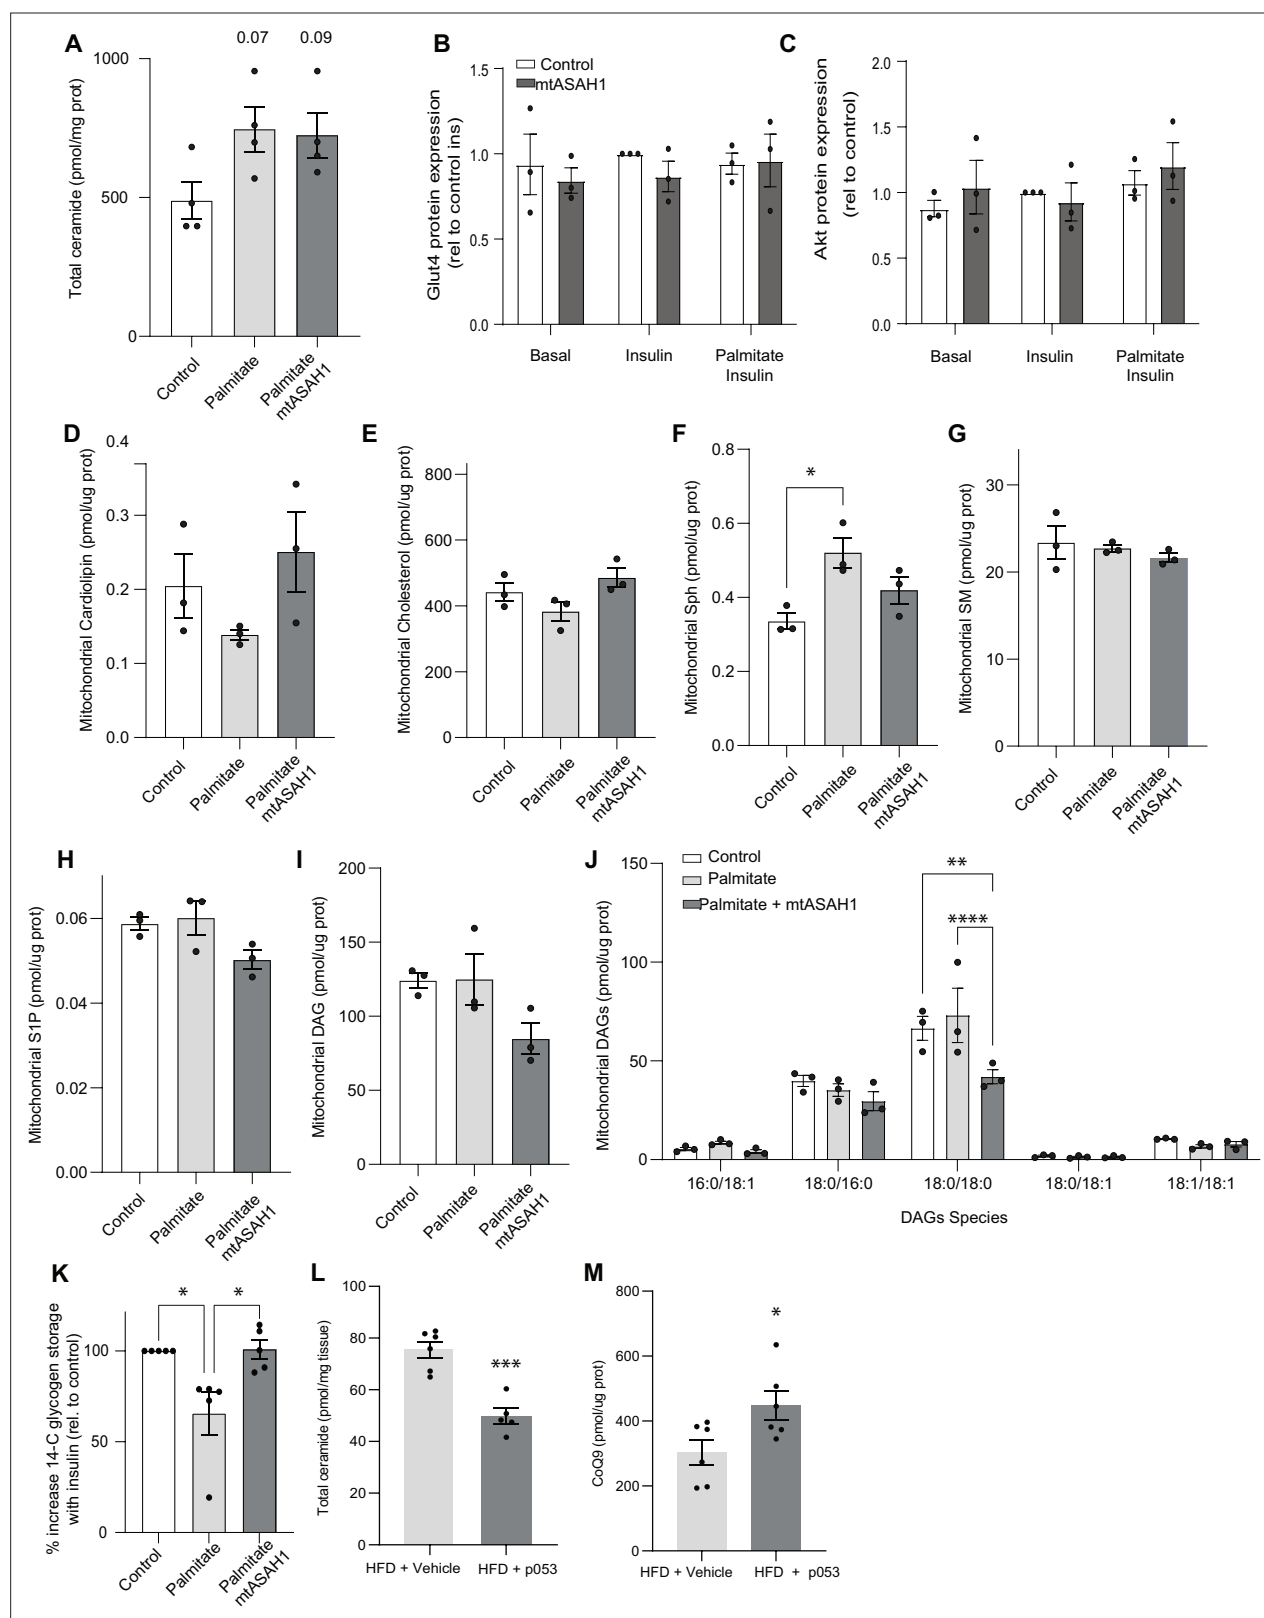

**Figure 3—figure supplement 1.** The overexpression of mtASA1H1 decreases DAGs in palmitate-treated cells. **(A)** Total ceramide levels extracted from whole lysate of L6 myotubes exposed to different treatments (as indicated). **(B, C)** Densitometric analysis of **Figure 3F** of selected proteins (as indicated). Mitochondrial levels of cardiolipin **(D)**, cholesterol **(E)**, sphingosine **(F)**, sphingomyelin **(G)**, sphingosine-1 phosphate **(H)**, and diacylglycerol **(I, J)** (as indicated) were determined by lipidomics and normalized against mitochondrial protein concentration. Cells were exposed to doxycycline for **Figure 3—figure supplement 1 continued on next page**



*Figure 3—figure supplement 1 continued*

3 d for ASAH1 induction. N = 3, mean  $\pm$  SEM. \* $p < 0.05$ , \*\* $p < 0.01$ , \*\*\*\* $p < 0.0001$ . **(K)** Insulin-induced glycogen synthesis. L6 myotubes were exposed to different treatments (as indicated) and glycogen storage was measured by  $^{14}\text{C}$  glucose (as indicated in the 'Materials and methods' section). Data is expressed as a percentage of increased  $^{14}\text{C}$ -glycogen after insulin stimulation relative to control cells. N = 4, mean  $\pm$  SEM. \* $p < 0.05$ . **(H, I)** Total ceramides **(H)** and mitochondrial coenzyme Q (CoQ) levels **(I)** in skeletal muscle from mice exposed to a high-fat diet and exposed to either vehicle (DMSO) or the inhibitor of CerS1 P053 (5 mg/kg) in drinking water for 6 wk as described in **Turner et al., 2018**. N = 6, mean  $\pm$  SEM. \* $p < 0.05$ , \*\*\*  $p < 0.001$  vs Control.

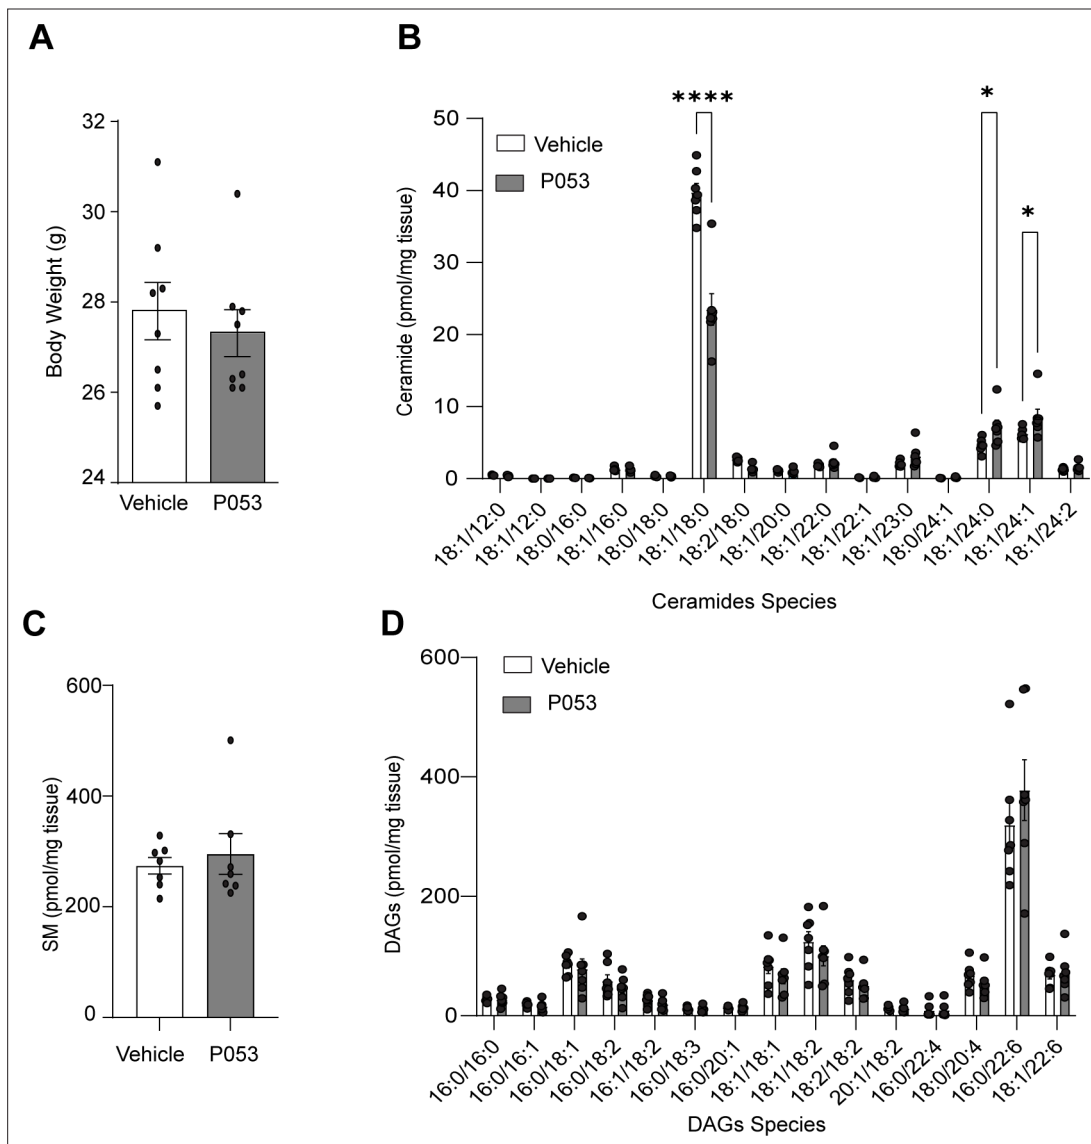

**Figure 3—figure supplement 2.** Lipidomic analysis of mice exposed to the CerS1 inhibitor P053. **(A)** Body weight of mice exposed to either vehicle (DMSO) or the inhibitor of CerS1 P053 (5 mg/kg) in drinking water for 6 wk. **(B)** Ceramide, **(C)** sphingomyelin, and **(D)** diacylglycerol species were determined in skeletal muscle by lipidomics and normalized against mg of tissue. N = 6, mean  $\pm$  SEM. \* $p < 0.05$ , \*\*\*\* $p < 0.0001$ .

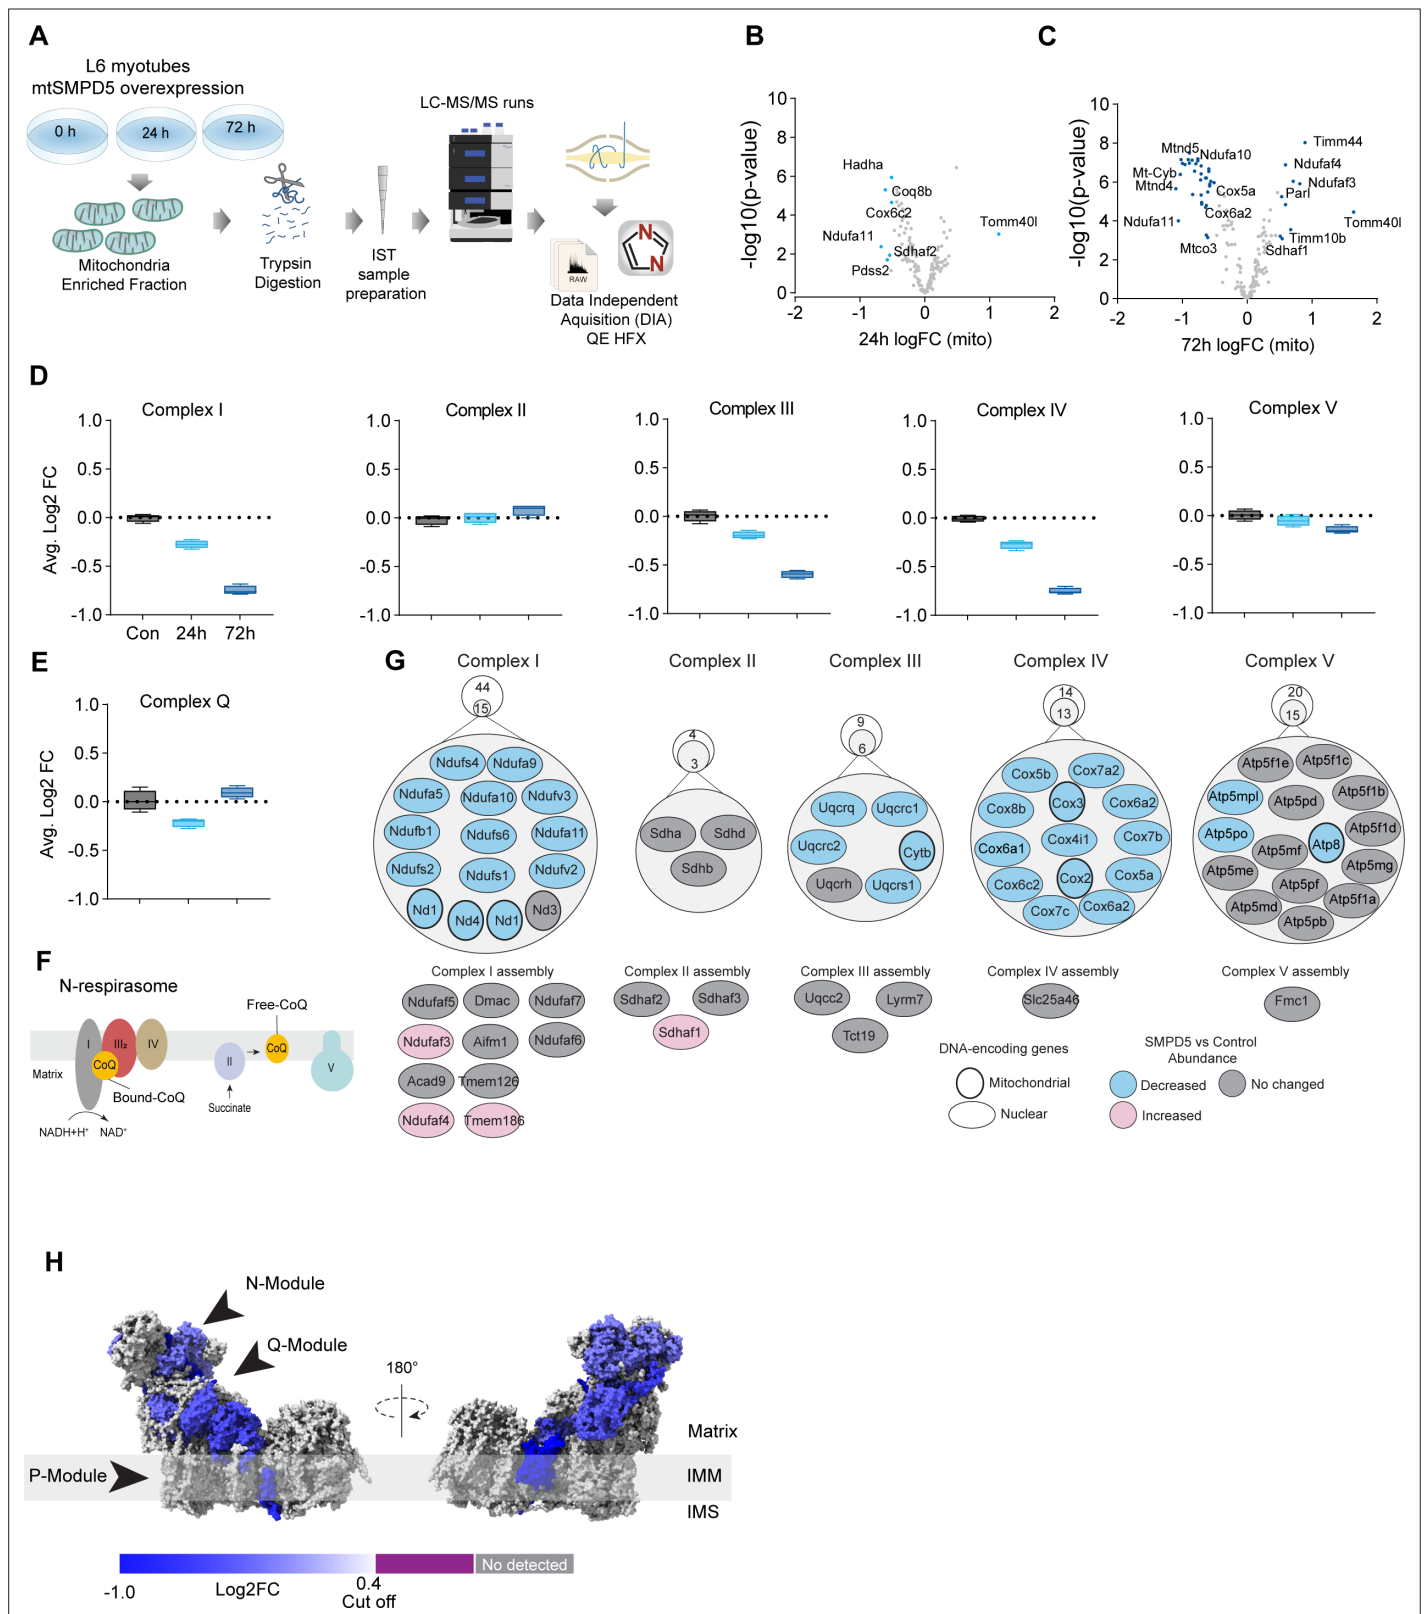

**Figure 4.** Mitochondrial ceramides induce a selective depletion of supercomplexes-associated proteins in L6 myotubes. **(A)** Workflow schematics. **(B, C)** Pairwise comparisons of mitochondrial proteome between all four groups. Cutoff for  $-\log_{10}$  adjusted p-value ( $-\log_{10}(\text{p-value})$ ) was set at 2 and  $\text{Log}_2(\text{FC})$  at 0.5 (blue). **(D)** Quantification of the OXPHOS protein complexes generated by the summed abundance of all subunits within a given complex. **(E)** Quantification of the complex Q (CoQ) protein complexes generated by the summed abundance of all subunits within the complex. **(F)** Schematics

Figure 4 continued on next page

## Figure 4 continued

of CoQ distribution between CI-binding and free CoQ (**Hernansanz-Agustín and Enríquez, 2021**). **(G)** Schematics of OXPHOS subunits (top) and assembly factors (bottom) significantly upregulated (light red), downregulated (blue), and no change (gray) after 72 hr of mtSMPD5 overexpression. **(H)** Subunit levels for proteins after mtSMPD5 overexpression mapped to the complex I structure (**Zhu et al., 2016**). The colors were calculated with an in-house Python script, and the resultant model was rendered using ChimeraX. Gray, not detected; purple, below cutoff ( $\text{Log}_2\text{FC} = 0.4$ ).

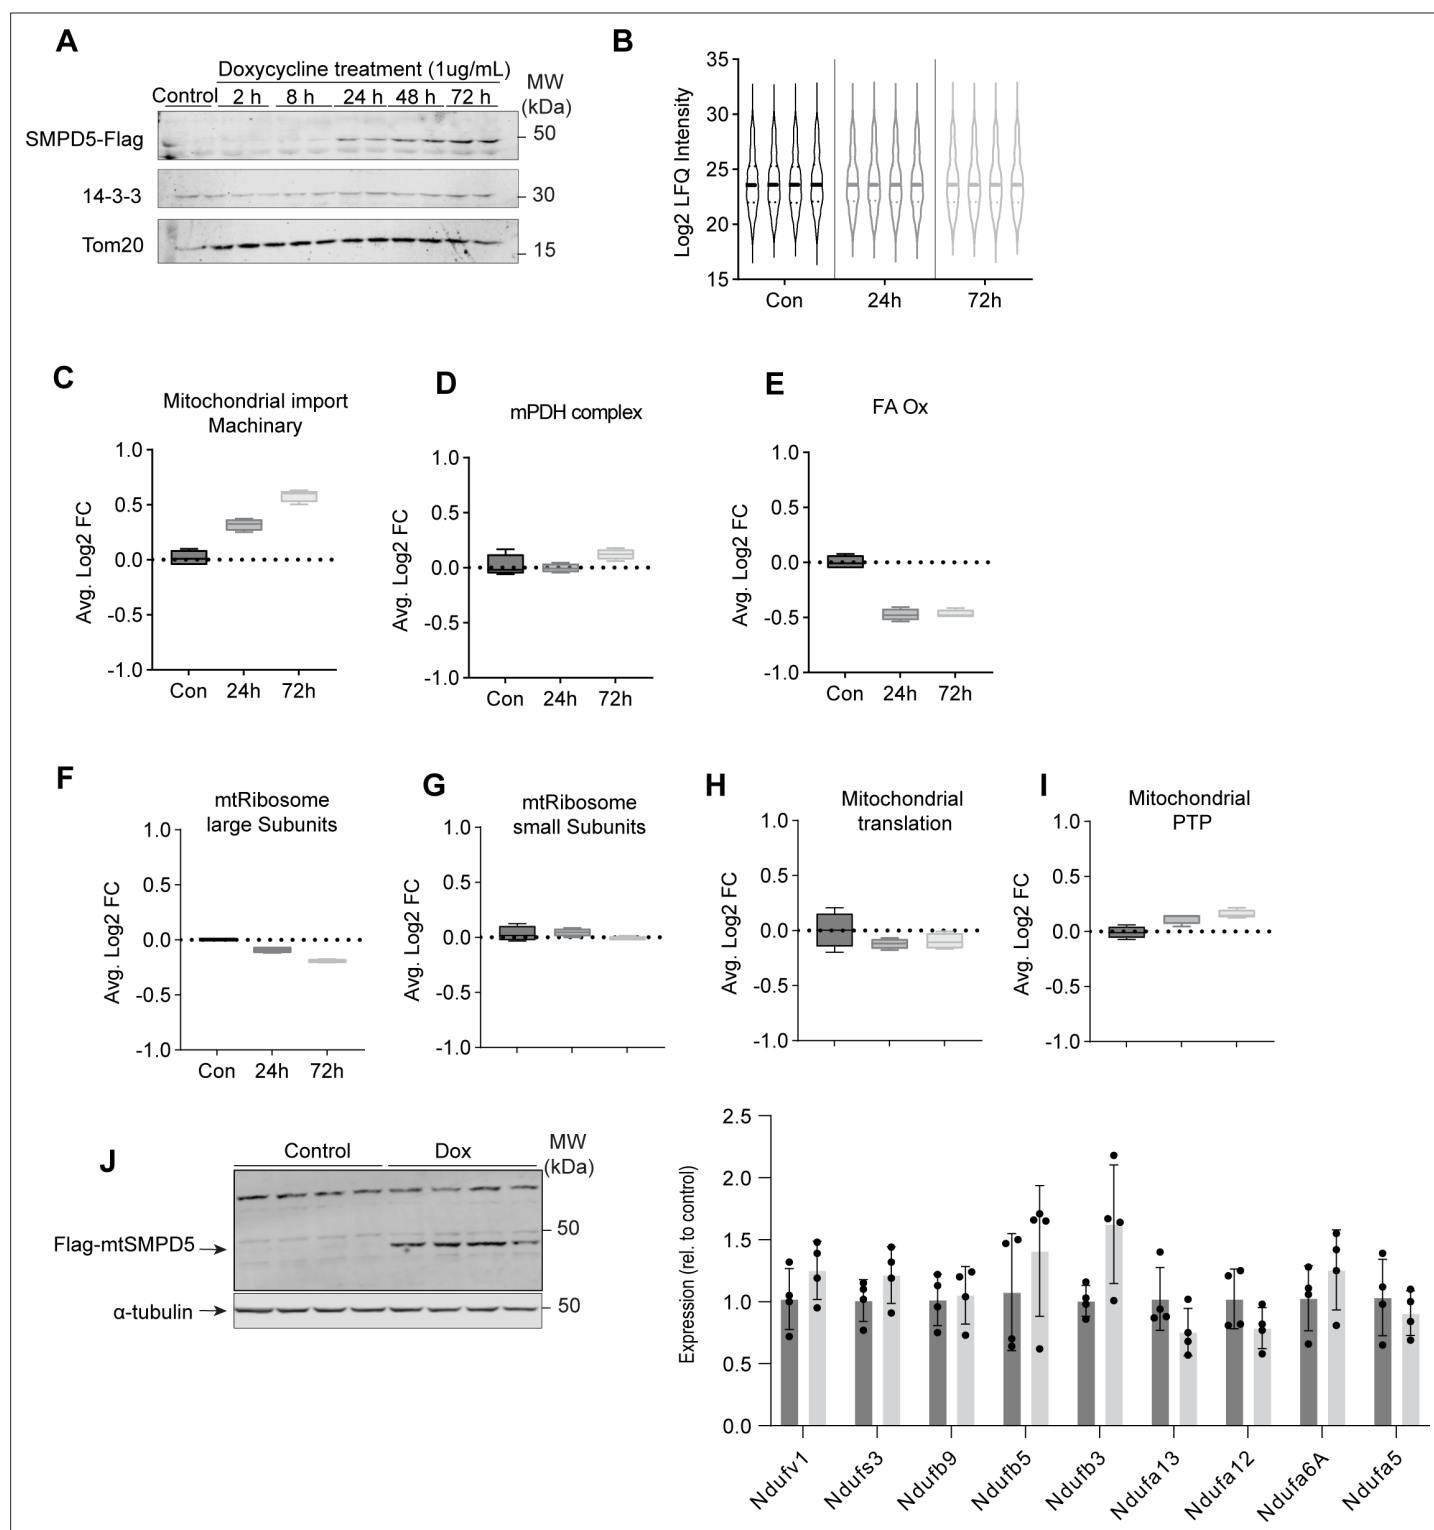

**Figure 4—figure supplement 1.** Proteomic analysis of mitochondrial fractions obtained from L6 myotubes overexpressing mtSMPD5. **(A)** L6 myotubes were exposed to doxycycline for different times to promote mtSMPD5 overexpression. The immunoblot of Flag is shown in **(A)**. **(B)** Violin plot of proteomic data after median normalization. **(C–I)** Summed intensities of protein and subunits associated with a specific process as denoted on the top of each graph.  $N = 4 \pm \text{SEM}$ . **(J)** L6 myotubes were exposed to doxycycline to promote mtSMPD5 overexpression. The immunoblot of Flag is shown in the left panel. mRNA levels for different complex I subunits were determined by RT-PCR and normalized against beta-actin.  $N = 4 \pm \text{SD}$ .

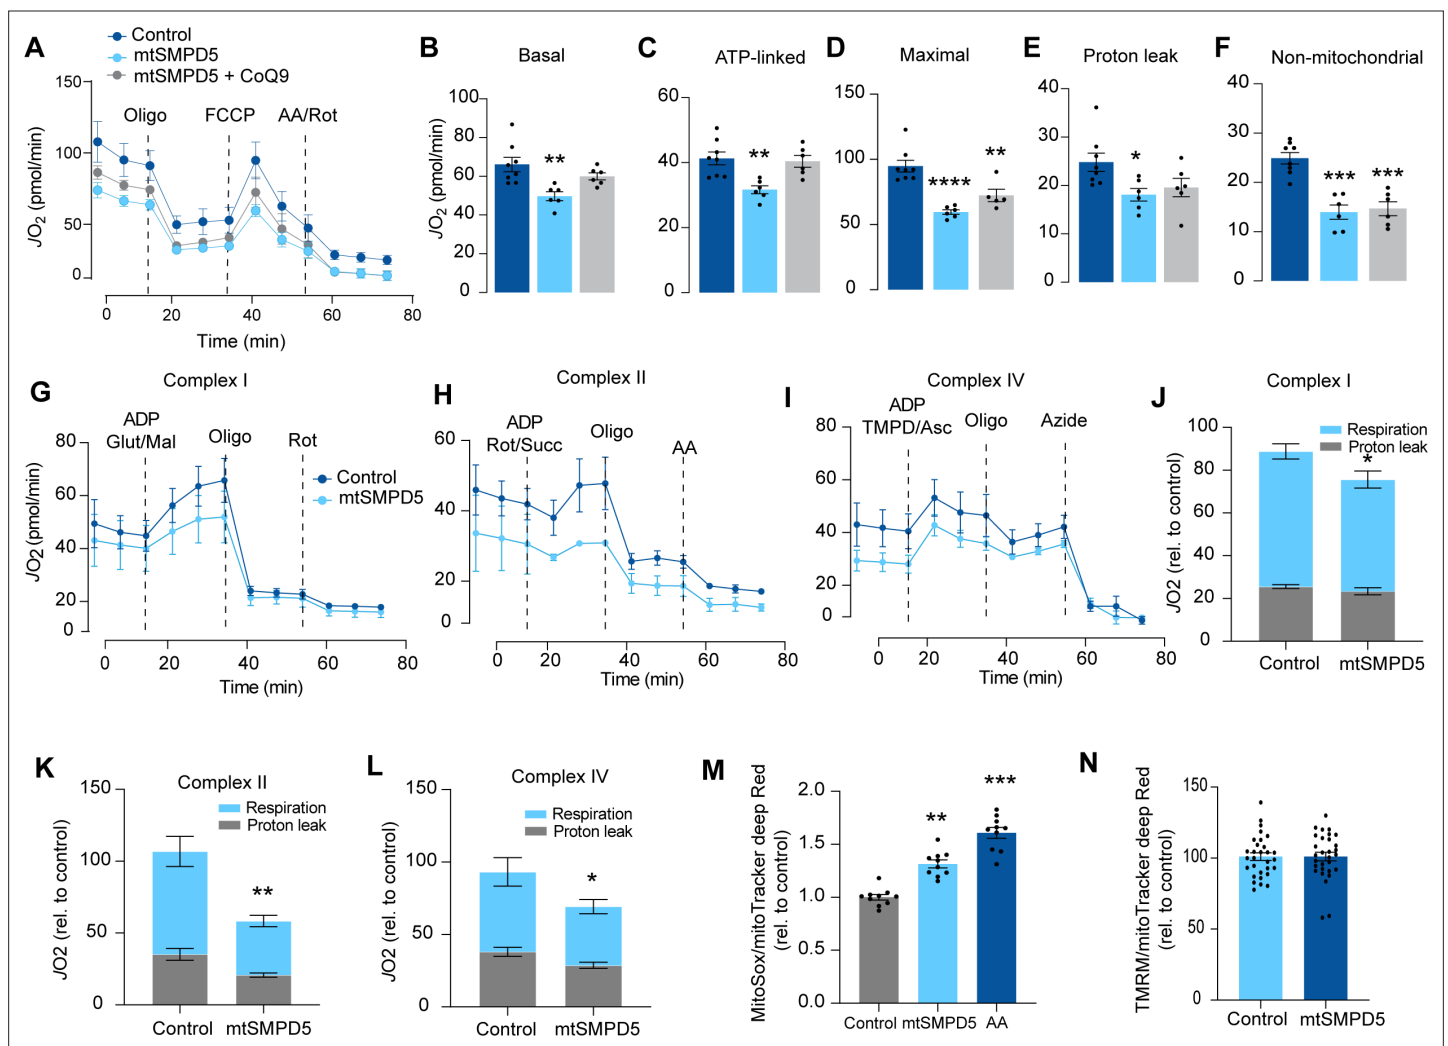

**Figure 5.** Mitochondrial ceramides impair mitochondrial function. **(A)** mtSMPD5 overexpression decreases oxygen consumption rate ( $JO_2$ ) (means  $\pm$  SEM;  $n = 6-8$  biological replicates) measured by mitochondrial stress test. After 1 hr no  $CO_2$  environment, cells were stimulated with oligomycin (Oligo), carbonyl cyanide-p-trifluoromethoxyphenylhydrazon (FCCP), and antimycin A (AA) and Rotenone (Rot) at indicated time points (means  $\pm$  SEM;  $n = 6-8$  biological replicates). **(B–F)** Quantification of  $JO_2$  measured by mitochondrial stress test from **Figure 6A** as described in the ‘Materials and methods’ section (means  $\pm$  SEM;  $n = 6-8$  biological replicates). \*  $p < 0.05$ , \*\*  $p < 0.01$ , \*\*\*  $p < 0.001$  vs Control. **(G–L)** mtSMPD5 overexpression diminishes respiratory CI (**G, J**), CII (**H, K**), and CIV (**I, L**).  $JO_2$  was performed in permeabilized cells supplemented with adenosine diphosphate (ADP) and CI to IV substrates (means  $\pm$  SEM;  $n = 3$  biological replicates). Mal, malate; Glut, glutamate; Rot, Rotenone; Succ, succinate; TMPD, tetramethyl-phenylenediamine; Asc, ascorbic acid; Oligo, oligomycin. (**J**), (**K**), and (**L**) are quantifications from graphs (**G**), (**H**), and (**I**), respectively. \*  $p < 0.05$ , \*\*  $p < 0.01$  vs Control. **(M)** mtSMPD5 overexpression increased mitochondrial oxidative stress. Cells were loaded with the redox-sensitive dye MitoSOX and the mitochondrial marker MitoTracker Deep Red for 30 min before imaging in a confocal microscope (see ‘Materials and methods’) (means  $\pm$  SEM;  $n = 10$  biological replicates). AA, antimycin A. \*\*  $p < 0.01$ , \*\*\*  $p < 0.001$  vs Control. **(N)** mtSMPD5 overexpression does not alter mitochondrial membrane potential. Cells were loaded with the potentiometric dye tetramethylrhodamine, ethyl ester, perchlorate (TMRM<sup>+</sup>) in non-quenching mode and the mitochondrial marker MitoTracker Deep Red for 30 min before imaging in a confocal microscope (see ‘Materials and methods’) (means  $\pm$  SEM;  $n > 10$  biological replicates).

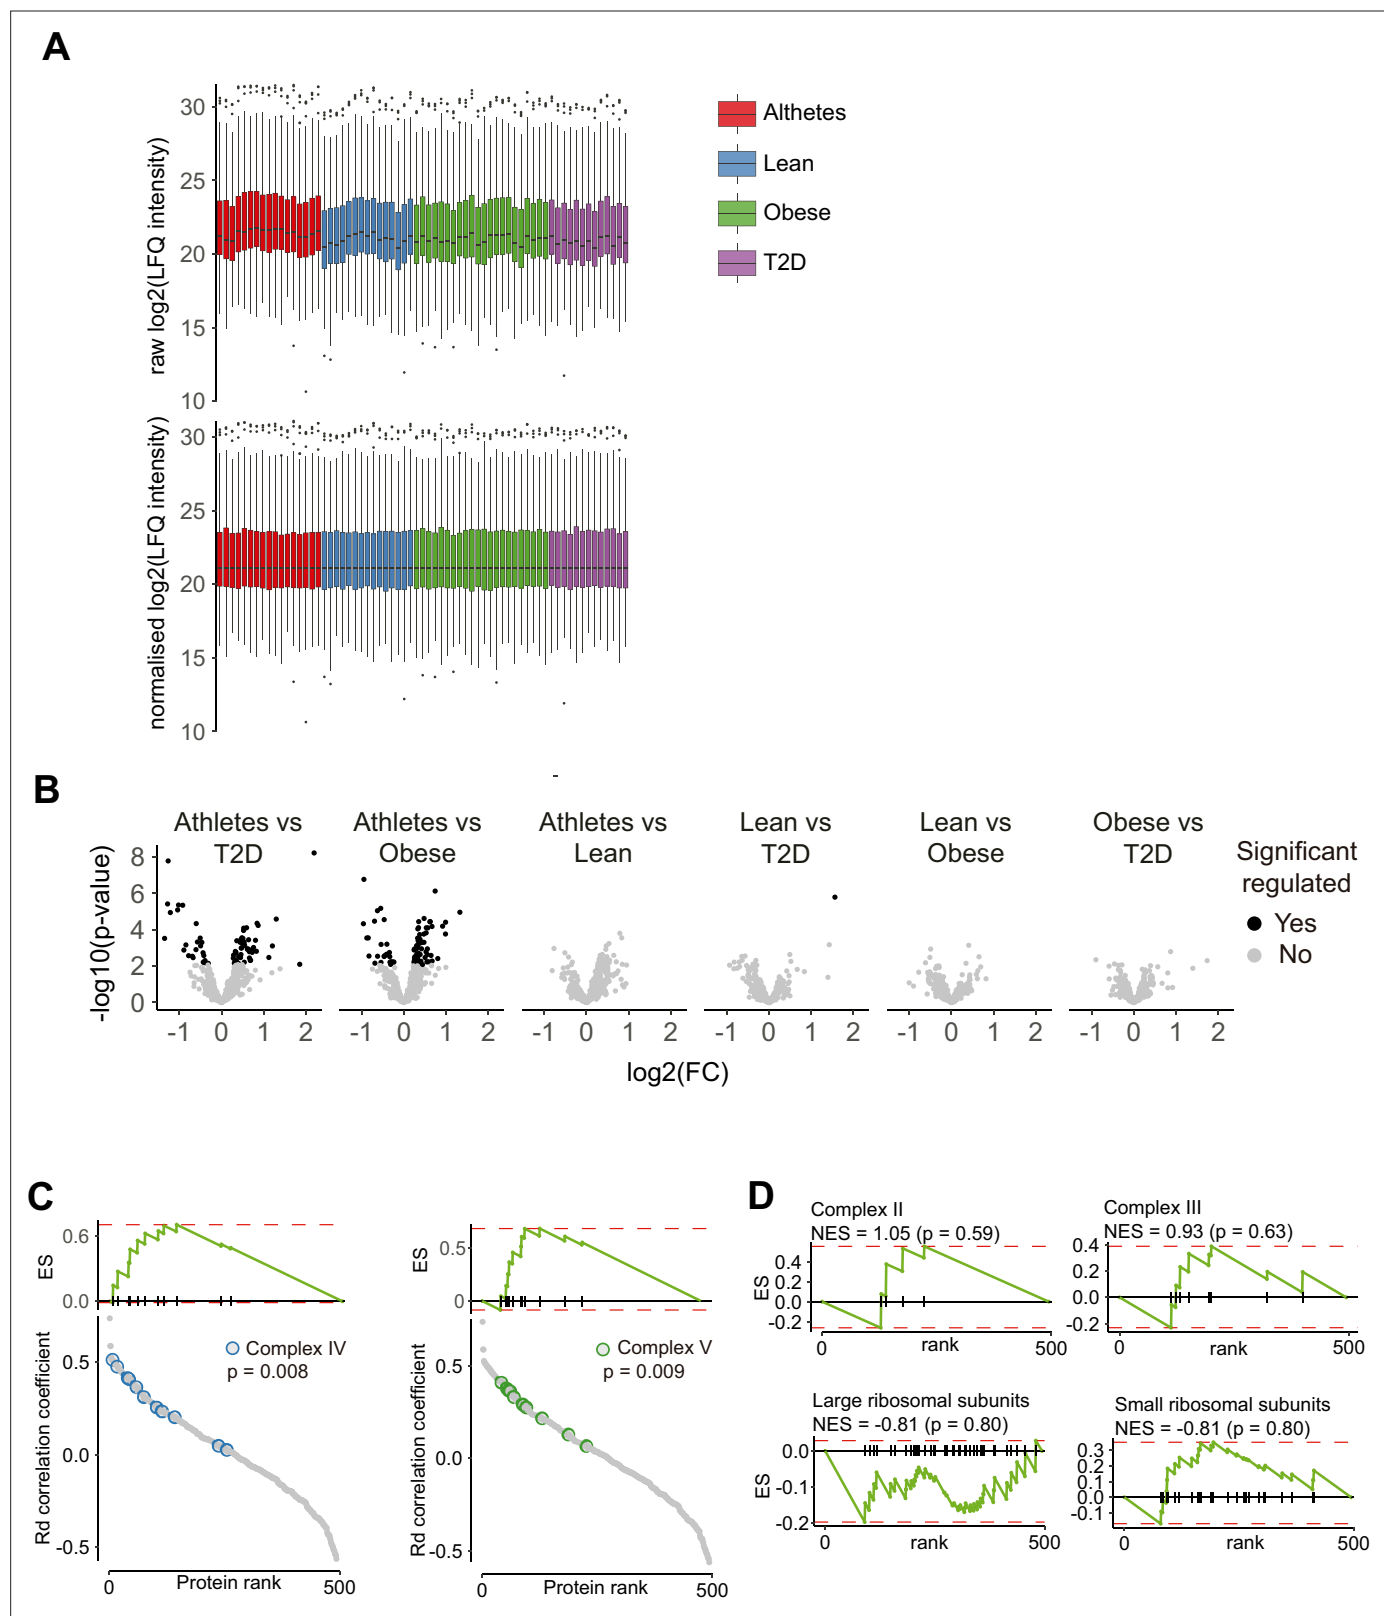

**Figure 5—figure supplement 1.** Proteomic analysis of mitochondria isolated from human muscle biopsies. **(A)** Box plot of all proteomics samples before (top) and after (bottom) median normalization. **(B)** Pairwise comparisons of mitochondrial proteome between all four groups. **(C)** Proteins rank against rate glucose disappearance during clamp (Rd) correlation. Proteins within complex IV and V of the electron transport chain associate with Rd. **(D)** Association of proteins within complex II, III, small and large ribosomal subunits with Rd.

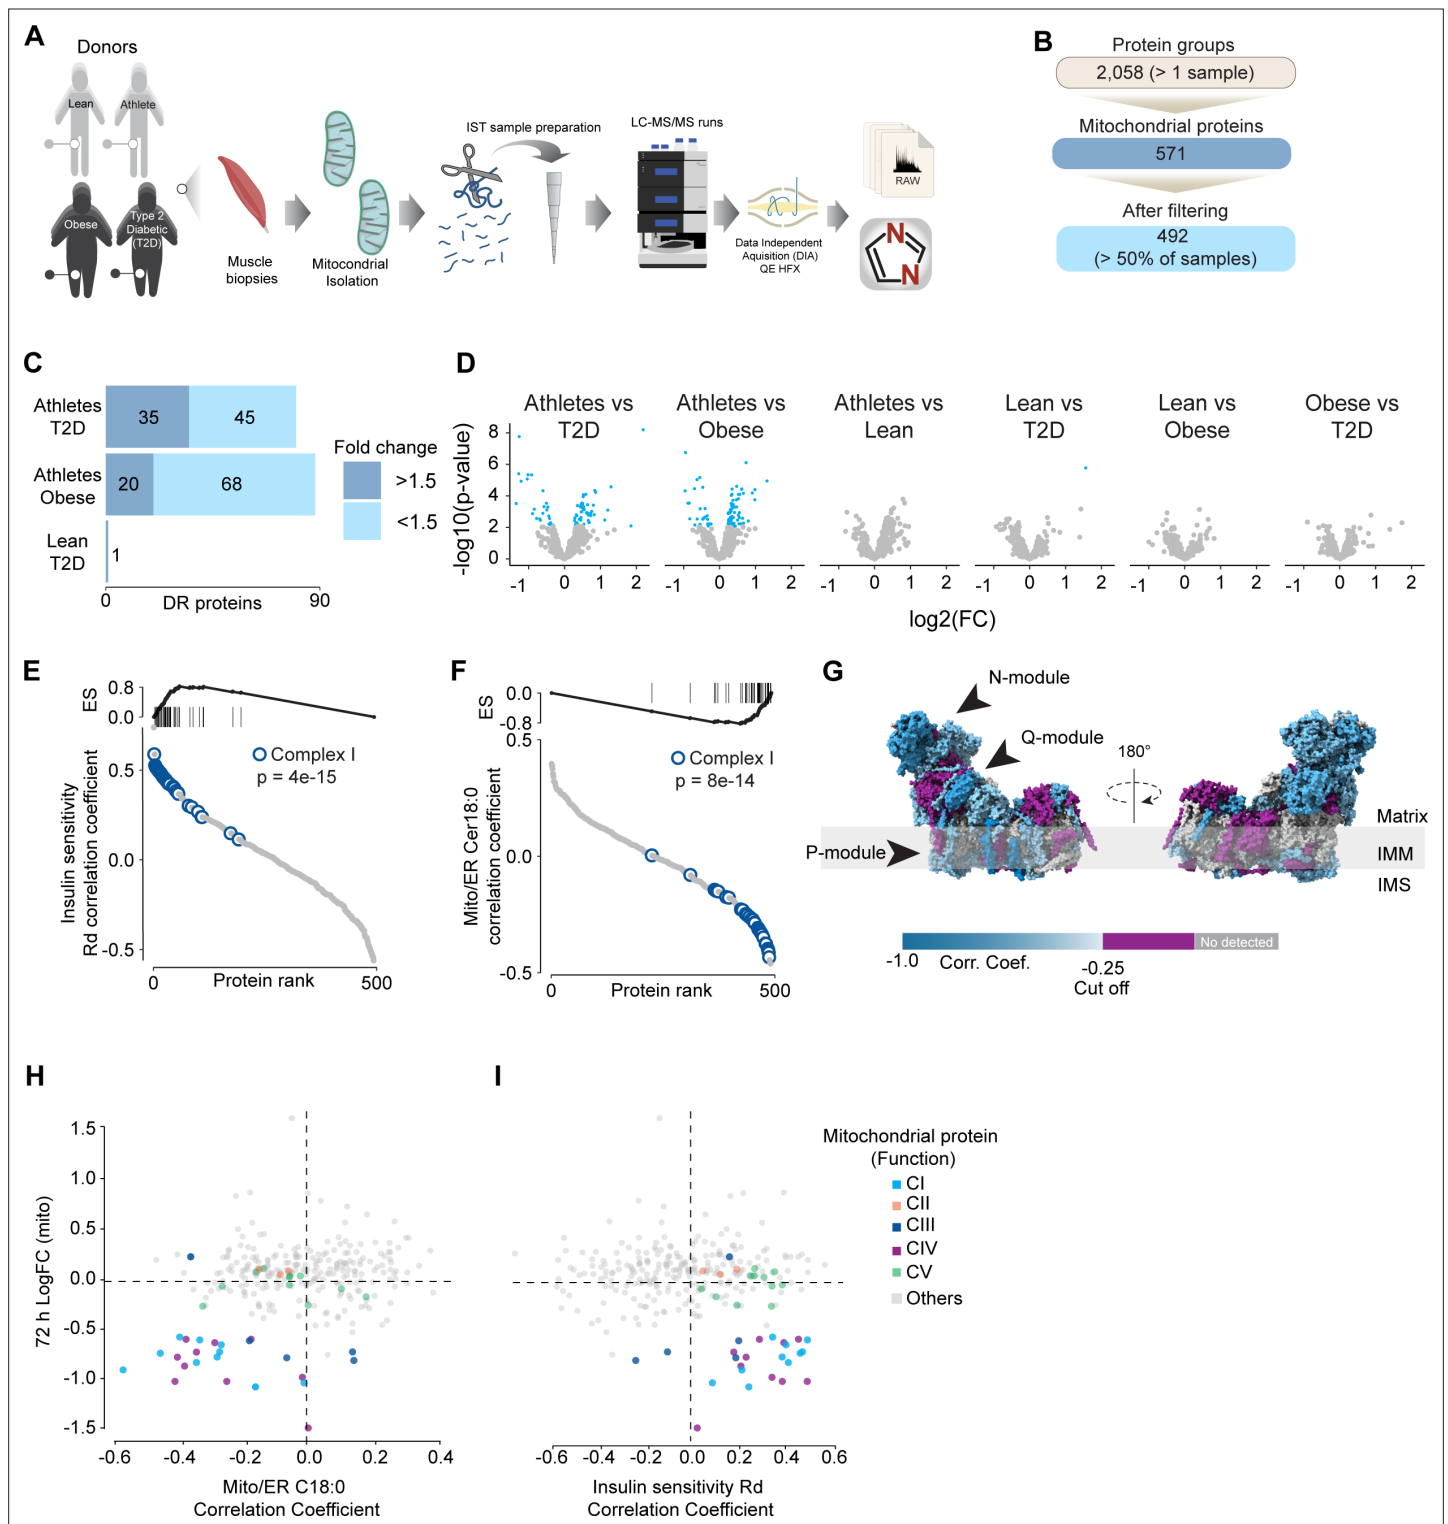

**Figure 6.** Mitochondrial proteome profiling associates complex I with muscle insulin sensitivity. **(A)** Quantification of proteins across samples. **(B)** Number of significant differentially regulated (DR) proteins by pairwise comparison. Groups not shown have no significantly regulated proteins after correcting for multiple testing. **(C)** Gene set enrichment between all comparisons. **(D)** Relative protein abundance in isolated mitochondria from human skeletal muscle cells. Comparisons are shown on the top of each graph. Light blue, significantly regulated proteins ( $-\log_{10}(p\text{-val})=2$ ). **(E)** Proteins rank against rate glucose disappearance during clamp (Rd) correlation. Proteins within complex I of the electron transport chain are highly significant with Rd. **(F)** Proteins rank against mitochondrial ceramide (Cer) 18:0 abundance. Proteins within complex I of the electron transport chain are highly significant with Cer18:0. **(G)** Subunit levels associated with mitochondrial ceramides mapped to the complex I structure (Zhu et al., 2016). The colors were

Figure 6 continued on next page



*Figure 6 continued*

calculated with an in-house Python script, and the resultant model was rendered using ChimeraX. Gray, no detected; purple, below cutoff (Corr. Coef. =  $-0.25$  to  $0.25$ ). **(H)** Quantification of the mitochondrial proteins generated by the summed abundance of all subunits associated with a specific function from mtSMPD5-L6 myotubes after 72 hr vs summed mitochondrial proteins (function) associated with either C18:0 ceramide (left panel) or insulin sensitivity (right panel) from human samples.
